# Supplementary material for: Radionuclide Transport and Uptake in Coastal Aquatic Ecosystems: A Comparison of a 3D Dynamic Model and a Compartment Model
Source: Springer Nature journal article supplement (doi:10.1007/s13280-013-0398-2), 2013-04-26
Supplement: MOESM1 [file 15653772]

## **Electronic Supplementary Material**

### **Radionuclide Transport and Uptake in Coastal Aquatic Ecosystems – a Comparison of a 3D Dynamic Model and a Compartment Model**

Anders Christian Erichsen, Lena Konovalenko, Flemming Møhlenberg, Rikke Margrethe Closter, Clare Bradshaw, Karin Aquilonius, Ulrik Kautsky

## BOX S1: PARTITION COEFFICIENTS ( $K_d$ )

In safety assessment of nuclear facilities, solid/liquid partition coefficients ( $K_d$ ) have been widely used to describe the sorption and retention of radionuclides (Sibley and Myttenere, 1986). In this paper, the K-model uses a single  $K_d$  value for total suspended particulate matter (PM), whereas the D-model uses separate  $K_d$  values for organic carbon ( $K_{d\ c}$ ) and inorganic matter such as clay ( $K_{d\ in}$ ).

In the **K-model**,  $K_d$  is defined as the ratio between the element concentration in suspended particulate matter  $C_p$  and the concentration in water  $C_w$ , i.e.,

$$K_d = C_p / C_w$$

and is expressed as ( $\text{Bq kg dw}^{-1}$ ) per ( $\text{Bq m}^{-3}$ ), i.e.,  $\text{m}^3 \text{ kg dw}^{-1}$  where dw is dry weight. The partition coefficient for particulate organic carbon (POC),  $K_{d\ \text{POC}}$  ( $\text{Bq gC}^{-1}$ ) per ( $\text{Bq m}^{-3}$ ) is the product of the  $K_d$  ( $\text{m}^3 \text{ kg dw}^{-1}$ ) and a conversion factor which is the

ratio of the mass (kg dw) of suspended particulate matter to its carbon content (g):  $0.006 \text{ (kg dw gC}^{-1}\text{)}$ . The  $K_{d\text{s}}$  used in the K-model are site-specific (Nordén et al. 2010) as shown in Table S1.

The **D-model** uses separate coefficients for organic carbon ( $K_{d\ c}$ ) and inorganic material ( $K_{d\ in}$ ).  $K_{d\ c}$  and  $K_{d\ in}$  were estimated from literature values of relations between element concentrations in ‘muddy’ sediments and their organic carbon content, where the intercept (zero organic carbon) is used to estimate  $K_{d\ in}$  and the slope is used to estimate  $K_{d\ c}$ . Being dynamic, the D-model resolves adsorption-desorption processes explicitly in each model cell, taking account of summed surface areas for inorganic and organic matter and imports and exports of radionuclides across grid cell boundaries, and uses  $K_d$  as an equilibrium representation of the ratio between adsorption rate and desorption rate. Modeled rates of adsorption and desorption of radionuclides are controlled at low concentrations using a Michaelis-Menten relation to fulfill Courant–Friedrichs–Lewy conditions (Erichsen et al. 2010).

**Table S1** Model constants for partition coefficients ( $K_d$ ) in model D and K. Note that units differ between the two models. The K-model follows the carbon cycle estimated as dry weight, whereas the D-model follows the carbon cycle estimated as both C and inorganic concentrations

| Radionuclide | D-model                                      |                                                | K-model                                  |
|--------------|----------------------------------------------|------------------------------------------------|------------------------------------------|
|              | $K_{d\ c}$<br>$\text{m}^3 \text{ kg C}^{-1}$ | $K_{d\ in}$<br>$\text{m}^3 \text{ kg dw}^{-1}$ | $K_d$<br>$\text{m}^3 \text{ kg dw}^{-1}$ |
| Cs-135       | 20                                           | 0.13                                           | 19                                       |
| Ni-59        | 2.1                                          | 0.015                                          | 14                                       |
| Th-230       | 417                                          | 1.67                                           | 740                                      |

## REFERENCES

- Erichsen, A.C., F. Møhlenberg, R.M. Closter, and J. Sandberg. 2010. Models for transport and fate of carbon, nutrients and radionuclides in the aquatic ecosystem at Öregrundsgrepen. Svensk Kärnbränslehantering AB, SKB R-10-10, Stockholm, Sweden, Report, 95 pp.
- Nordén, S., R. Avila, I. de la Cruz, K. Stenberg, and S. Grolander. 2010. Element specific and constants parameters used for dose calculations in SR-Site. Svensk Kärnbränslehantering AB, SKB TR-10-07, Stockholm, Sweden, Report, 123 pp.
- Sibley, T. H., and C. Myttenere, eds. 1986. *Application of distribution coefficients to radiological assessment models*. Oxford: Elsevier Science Ltd., 430 pp
